# Supplementary material for: Efficacy of dehydroepiandrosterone priming in women with poor ovarian response undergoing IVF/ICSI: a meta-analysis
Source: PubMed Central journal article supplement (PMC10288189; doi:10.3389/fendo.2023.1156280), 2023-06-09
Supplement: DataSheet_1.pdf [file DataSheet_1.pdf]

## **Supplementary Materials**

### **Table legends**

Table S1. PRISMA 2020 checklist.

Table S2. Search strategy.

Table S3. Characteristics of the included studies.

Table S4. Results of quality assessment using ROBINS-I for non-RCTs.

Table S5. Meta-analyses of patients treated with DHEA or not.

Table S6. Univariable meta-regression analyses for outcomes with significant difference.

### **Figure legends**

Figure S1. Results of quality assessment using ROB2 for RCTs.

Figure S2. Meta-analysis of studies of DHEA supplementation for outcomes of **(A)** AFC; **(B)** AMH; **(C)** FSH; **(D)** Total doses of gonadotropin; **(E)** Days of stimulation; **(F)** E<sub>2</sub> level on the day of hCG administration; **(G)** Endometrial thickness; **(H)** Number of oocytes retrieved; **(I)** Number of oocytes transferred; **(J)** Miscarriage rate.

Figure S3. The subgroup meta-analysis by type of study design for the outcome of days of stimulation in poor responders undergoing IVF treatment.

Table S1. PRISMA 2020 checklist.

| Section and Topic             | Item # | Checklist item                                                                                                                                                                                                                                                                                       | Location where item is reported |
|-------------------------------|--------|------------------------------------------------------------------------------------------------------------------------------------------------------------------------------------------------------------------------------------------------------------------------------------------------------|---------------------------------|
| <b>TITLE</b>                  |        |                                                                                                                                                                                                                                                                                                      |                                 |
| Title                         | 1      | Identify the report as a systematic review.                                                                                                                                                                                                                                                          | 1                               |
| <b>ABSTRACT</b>               |        |                                                                                                                                                                                                                                                                                                      |                                 |
| Abstract                      | 2      | See the PRISMA 2020 for Abstracts checklist.                                                                                                                                                                                                                                                         | 1                               |
| <b>INTRODUCTION</b>           |        |                                                                                                                                                                                                                                                                                                      |                                 |
| Rationale                     | 3      | Describe the rationale for the review in the context of existing knowledge.                                                                                                                                                                                                                          | 2                               |
| Objectives                    | 4      | Provide an explicit statement of the objective(s) or question(s) the review addresses.                                                                                                                                                                                                               | 3                               |
| <b>METHODS</b>                |        |                                                                                                                                                                                                                                                                                                      |                                 |
| Eligibility criteria          | 5      | Specify the inclusion and exclusion criteria for the review and how studies were grouped for the syntheses.                                                                                                                                                                                          | 3                               |
| Information sources           | 6      | Specify all databases, registers, websites, organisations, reference lists and other sources searched or consulted to identify studies. Specify the date when each source was last searched or consulted.                                                                                            | 3                               |
| Search strategy               | 7      | Present the full search strategies for all databases, registers and websites, including any filters and limits used.                                                                                                                                                                                 | 3, Table S2                     |
| Selection process             | 8      | Specify the methods used to decide whether a study met the inclusion criteria of the review, including how many reviewers screened each record and each report retrieved, whether they worked independently, and if applicable, details of automation tools used in the process.                     | 3                               |
| Data collection process       | 9      | Specify the methods used to collect data from reports, including how many reviewers collected data from each report, whether they worked independently, any processes for obtaining or confirming data from study investigators, and if applicable, details of automation tools used in the process. | 3                               |
| Data items                    | 10a    | List and define all outcomes for which data were sought. Specify whether all results that were compatible with each outcome domain in each study were sought (e.g. for all measures, time points, analyses), and if not, the methods used to decide which results to collect.                        | 3                               |
|                               | 10b    | List and define all other variables for which data were sought (e.g. participant and intervention characteristics, funding sources). Describe any assumptions made about any missing or unclear information.                                                                                         | 3                               |
| Study risk of bias assessment | 11     | Specify the methods used to assess risk of bias in the included studies, including details of the tool(s) used, how many reviewers assessed each study and whether they worked independently, and if applicable, details of automation tools used in the process.                                    | 4                               |
| Effect measures               | 12     | Specify for each outcome the effect measure(s) (e.g. risk ratio, mean difference) used in the synthesis or presentation of results.                                                                                                                                                                  | 4                               |
| Synthesis                     | 13a    | Describe the processes used to decide which studies were eligible for each synthesis (e.g. tabulating the study                                                                                                                                                                                      | 3                               |

| Section and Topic             | Item # | Checklist item                                                                                                                                                                                                                                                                       | Location where item is reported |
|-------------------------------|--------|--------------------------------------------------------------------------------------------------------------------------------------------------------------------------------------------------------------------------------------------------------------------------------------|---------------------------------|
| methods                       |        | intervention characteristics and comparing against the planned groups for each synthesis (item #5)).                                                                                                                                                                                 |                                 |
|                               | 13b    | Describe any methods required to prepare the data for presentation or synthesis, such as handling of missing summary statistics, or data conversions.                                                                                                                                | 3                               |
|                               | 13c    | Describe any methods used to tabulate or visually display results of individual studies and syntheses.                                                                                                                                                                               | 3                               |
|                               | 13d    | Describe any methods used to synthesize results and provide a rationale for the choice(s). If meta-analysis was performed, describe the model(s), method(s) to identify the presence and extent of statistical heterogeneity, and software package(s) used.                          | 4                               |
|                               | 13e    | Describe any methods used to explore possible causes of heterogeneity among study results (e.g. subgroup analysis, meta-regression).                                                                                                                                                 | 4                               |
|                               | 13f    | Describe any sensitivity analyses conducted to assess robustness of the synthesized results.                                                                                                                                                                                         | 4                               |
| Reporting bias assessment     | 14     | Describe any methods used to assess risk of bias due to missing results in a synthesis (arising from reporting biases).                                                                                                                                                              | 4                               |
| Certainty assessment          | 15     | Describe any methods used to assess certainty (or confidence) in the body of evidence for an outcome.                                                                                                                                                                                | 4                               |
| <b>RESULTS</b>                |        |                                                                                                                                                                                                                                                                                      |                                 |
| Study selection               | 16a    | Describe the results of the search and selection process, from the number of records identified in the search to the number of studies included in the review, ideally using a flow diagram.                                                                                         | 4, Figure 1                     |
|                               | 16b    | Cite studies that might appear to meet the inclusion criteria, but which were excluded, and explain why they were excluded.                                                                                                                                                          | 4                               |
| Study characteristics         | 17     | Cite each included study and present its characteristics.                                                                                                                                                                                                                            | 4, Table S3                     |
| Risk of bias in studies       | 18     | Present assessments of risk of bias for each included study.                                                                                                                                                                                                                         | Table S4, Figure S1             |
| Results of individual studies | 19     | For all outcomes, present, for each study: (a) summary statistics for each group (where appropriate) and (b) an effect estimate and its precision (e.g. confidence/credible interval), ideally using structured tables or plots.                                                     | Table S3                        |
| Results of syntheses          | 20a    | For each synthesis, briefly summarise the characteristics and risk of bias among contributing studies.                                                                                                                                                                               | 4-5                             |
|                               | 20b    | Present results of all statistical syntheses conducted. If meta-analysis was done, present for each the summary estimate and its precision (e.g. confidence/credible interval) and measures of statistical heterogeneity. If comparing groups, describe the direction of the effect. | 4-5                             |
|                               | 20c    | Present results of all investigations of possible causes of heterogeneity among study results.                                                                                                                                                                                       | 4-5                             |
|                               | 20d    | Present results of all sensitivity analyses conducted to assess the robustness of the synthesized results.                                                                                                                                                                           | 4-5                             |

| Section and Topic                              | Item # | Checklist item                                                                                                                                                                                                                             | Location where item is reported |
|------------------------------------------------|--------|--------------------------------------------------------------------------------------------------------------------------------------------------------------------------------------------------------------------------------------------|---------------------------------|
| Reporting biases                               | 21     | Present assessments of risk of bias due to missing results (arising from reporting biases) for each synthesis assessed.                                                                                                                    | 4-5                             |
| Certainty of evidence                          | 22     | Present assessments of certainty (or confidence) in the body of evidence for each outcome assessed.                                                                                                                                        | 4-5                             |
| <b>DISCUSSION</b>                              |        |                                                                                                                                                                                                                                            |                                 |
| Discussion                                     | 23a    | Provide a general interpretation of the results in the context of other evidence.                                                                                                                                                          | 5                               |
|                                                | 23b    | Discuss any limitations of the evidence included in the review.                                                                                                                                                                            | 7                               |
|                                                | 23c    | Discuss any limitations of the review processes used.                                                                                                                                                                                      | 8                               |
|                                                | 23d    | Discuss implications of the results for practice, policy, and future research.                                                                                                                                                             | 7                               |
| <b>OTHER INFORMATION</b>                       |        |                                                                                                                                                                                                                                            |                                 |
| Registration and protocol                      | 24a    | Provide registration information for the review, including register name and registration number, or state that the review was not registered.                                                                                             | 3                               |
|                                                | 24b    | Indicate where the review protocol can be accessed, or state that a protocol was not prepared.                                                                                                                                             | 3                               |
|                                                | 24c    | Describe and explain any amendments to information provided at registration or in the protocol.                                                                                                                                            | 7                               |
| Support                                        | 25     | Describe sources of financial or non-financial support for the review, and the role of the funders or sponsors in the review.                                                                                                              | 8                               |
| Competing interests                            | 26     | Declare any competing interests of review authors.                                                                                                                                                                                         | 8                               |
| Availability of data, code and other materials | 27     | Report which of the following are publicly available and where they can be found: template data collection forms; data extracted from included studies; data used for all analyses; analytic code; any other materials used in the review. | 8                               |

Table S2. Search strategy.

| Search strategy of Pubmed                                                                                                                                                                                                                                                                                                                                                                                                                                                                                                                                                                                                                                                                                                                                                                                                                                                                                                                                                                                                                                                                                                                                                                                                                                                                                                                                                                                                                                                 |
|---------------------------------------------------------------------------------------------------------------------------------------------------------------------------------------------------------------------------------------------------------------------------------------------------------------------------------------------------------------------------------------------------------------------------------------------------------------------------------------------------------------------------------------------------------------------------------------------------------------------------------------------------------------------------------------------------------------------------------------------------------------------------------------------------------------------------------------------------------------------------------------------------------------------------------------------------------------------------------------------------------------------------------------------------------------------------------------------------------------------------------------------------------------------------------------------------------------------------------------------------------------------------------------------------------------------------------------------------------------------------------------------------------------------------------------------------------------------------|
| <p> ("dehydroepiandrosterone"[MeSH Terms] OR "dehydroepiandrosterone" OR "dhea") AND<br/> (((("poverty"[MeSH Terms] OR "poverty" OR "poor") AND ("ovarian" OR "ovarians") AND<br/> ("response" OR "responses" OR "responsive" OR "responsiveness" OR "responsivenesses" OR<br/> "responsives" OR "responsivities" OR "responsivity")) OR ("pathol oncol res"[Journal] OR "por")<br/> OR ((("poverty"[MeSH Terms] OR "poverty" OR "poor") AND ("respond" OR "respondant" OR<br/> "respondants" OR "responded" OR "respondent s" OR "responder" OR "responders" OR<br/> "responding" OR "respondings" OR "responds" OR "surveys and questionnaires"[MeSH Terms]<br/> OR ("surveys" AND "questionnaires") OR "surveys and questionnaires" OR "respondent" OR<br/> "respondents")) OR ("diminish" OR "diminished" OR "diminishes" OR "diminishing" OR<br/> "diminishment" OR "diminishments") AND ("ovarian reserve"[MeSH Terms] OR ("ovarian" AND<br/> "reserve") OR "ovarian reserve")) OR "DOR") AND ("j in vitro fert embryo transf"[Journal] OR<br/> "ivf" OR ("in vitro fertilisation" OR "fertilization in vitro"[MeSH Terms] OR ("fertilization" AND<br/> "vitro") OR "fertilization in vitro" OR ("vitro" AND "fertilization") OR "in vitro fertilization") OR<br/> ("sperm" AND "injections" AND "intracytoplasmic") OR "intracytoplasmic sperm injections" OR<br/> "icisi") OR ("sperm injections, intracytoplasmic"[MeSH Terms] OR ("sperm" AND "injections" </p> |

AND "intracytoplasmic") OR "intracytoplasmic sperm injections" OR ("intracytoplasmic" AND "sperm" AND "injection") OR "intracytoplasmic sperm injection") OR ("reproductive techniques, assisted"[MeSH Terms] OR ("reproductive" AND "techniques" AND "assisted") OR "assisted reproductive techniques" OR ("assisted" AND "reproductive" AND "technique") OR "assisted reproductive technique")

Note: Search strategies of other databases were modified accordingly.

Table S3. Characteristics of the included studies.

| Study                         | Country              | Design | Inclusion criteria                                                                              | Study group/post-DHEA |            |            |            | Control group/pre-DHEA |            |            |            | Intervention |                     | Stimulation protocol             | Outcomes       |
|-------------------------------|----------------------|--------|-------------------------------------------------------------------------------------------------|-----------------------|------------|------------|------------|------------------------|------------|------------|------------|--------------|---------------------|----------------------------------|----------------|
|                               |                      |        |                                                                                                 | n                     | Age        | BMI        | bFSH       | n                      | Age        | BMI        | bFSH       | Dose         | Duration            |                                  |                |
| Wiser et al. (2010)(1)        | Israel               | RCT    | POR: <5 oocytes retrieved or previous cycle cancelation                                         | 17                    | 36.9±4.7   | 26.1±5.5   | 9.63±3.23  | 16                     | 37.8±4.6   | 25.7±4.6   | 9.82±2.97  | 75 mg/d      | > 6-18 weeks        | Long GnRH agonist                | f-l            |
| Artini et al. (2012)(2)       | italy                | RCT    | POR: Bologna criteria                                                                           | 12                    | 36.58±3.32 | 21.7±3.1   | 5.78±1.45  | 12                     | 37±4.61    | 21.6±3.1   | 6.68±1.79  | 25 mg tid    | 3 months            | GnRH antagonist                  | d-f, h-j       |
| Moawad et al. (2012)(3)       | United Arab Emirates | RCT    | POR: <5 oocytes retrieved or previous cycle cancelation; and AMH<1.7 ug/L                       | 67                    | 37.4±6.4   | 29.1±3.8   | NA         | 66                     | 37.1±7.2   | 28.7±4.1   | NA         | 25 mg tid    | >12 weeks           | Short GnRH agonist               | c-j            |
| An et al. (2013)(4)           | China                | RCT    | POR: Bologna criteria                                                                           | 81                    | 35.8±4.1   | NA         | 9.3±2.6    | 92                     | 35.9±2.9   | NA         | 10±2       | 75 mg/d      | 12 weeks            | Long agonist/antagonist protocol | d-j            |
| Yeung et al. (2014)(5)        | China                | RCT    | POR: age≤40 years, subfertility >1 year, and AFC <5                                             | 16                    | 36.17±0.85 | 21.63±0.96 | 11.03±1.75 | 16                     | 36.8±0.85  | 21.23±1.13 | 13.72±1.55 | 25 mg tid    | >12 weeks           | GnRH antagonist protocol         | d-l            |
| Li et al. (2014)(6)           | China                | RCT    | POR: age ≥35 or oocytes retrieved <5; and AFC<5 or bFSH>10IU/L.                                 | 42                    | 37.8±4.6   | NA         | 10.35±3.27 | 47                     | 36.9±4.7   | NA         | 9.93±3.51  | 75 mg/d      | 12 weeks            | Not reported in details          | a, d-f, h, j-l |
| Zhang et al. (2014)(7)        | China                | RCT    | DOR: ≥ 10 IU/L FSH or FSH/LH > 3; AFC<5; and <5 oocytes retrieved or previous cycle cancelation | 42                    | 37.17±5.22 | 22.13±2.92 | 11.68±6.62 | 42                     | 37.43±4.33 | 22.46±2.42 | 10.81±2.41 | 75 mg/d      | 12 weeks            | Not reported                     | a-c, f, j      |
| Kara et al. (2014)(8)         | Turkey               | RCT    | DOR: AMH <1 ng/ml or FSH >15 IU/L; and AFC<4                                                    | 104                   | 30.97±5.76 | NA         | 16.31±0.91 | 104                    | 31.15±5.58 | NA         | 17.13±0.98 | 25 mg tid    | 12 weeks            | Microdose flare                  | f, h, j        |
| Tartagni et al. (2015)(9)     | Italy                | RCT    | Age-related poor responses: 36 to 40 years and normal ovarian reserve                           | 53                    | 37.1±2.2   | 22.1±1.6   | 6.5±1.3    | 56                     | 37.4±2.9   | 22.5±1.4   | 6.38±1.3   | 75 mg/d      | 8 weeks             | Long agonist/antagonist GnRH     | f-l            |
| Kotb et al. (2016)(10)        | Egypt                | RCT    | POR: Bologna criteria                                                                           | 70                    | 40.05±3.1  | 25.6±3.4   | 12.1±0.9   | 70                     | 39.7±0.5   | 25.1±3.4   | 11.9±0.8   | 25 mg tid    | 12 weeks            | GnRH antagonist                  | d-f, h-j       |
| Agarwal et al. (2017)(11)     | India                | RCT    | DOR: elevated age-specific FSH or AMH<1.05 ng/ml or AFC≤4                                       | 40                    | 33.1±4.2   | 25.01±3.31 | 10.68±6.49 | 40                     | 32.3±4.07  | 25.04±3.77 | 12.69±8.01 | 75 mg/d      | 12 weeks            | Not reported                     | a-c            |
| Narkwicbean et al. (2017)(12) | United Kingdom       | RCT    | DOR: AFC<10 and/or AMH<5 pmol/l                                                                 | 27                    | 36.8±3.9   | 24.5±4.7   | NA         | 25                     | 35.2±5.3   | 23.7±3.3   | NA         | 75 mg/d      | >12 weeks           | GnRH agonist                     | c-h, j-l       |
| Elprince et al. (2020)(13)    | Egypt                | RCT    | POR: AMH < 1.1 ng/mL, bFSH ≥ 10IU/L and ≤ 15 IU/L, and AFC ≤ 4                                  | 25                    | 36.52±2.26 | 23.08±1.47 | 12.16±0.94 | 25                     | 36.28±2.53 | 22.56±1.8  | 11.94±1.11 | 75 mg/d      | 2 Continuous cycles | Not reported                     | a-f, j         |

|                                      |                          |                 |                                                                                                                                                               |     |            |            |            |     |            |            |            |           |                 |                               |              |
|--------------------------------------|--------------------------|-----------------|---------------------------------------------------------------------------------------------------------------------------------------------------------------|-----|------------|------------|------------|-----|------------|------------|------------|-----------|-----------------|-------------------------------|--------------|
| Wang et al. (2021)(14)               | China                    | RCT             | POR: Bologna criteria                                                                                                                                         | 410 | 39±4.64    | 23.83±3.16 | 9.34±0.91  | 411 | 39.53±4.39 | 24.01±3.07 | 9.22±0.91  | 25 mg tid | 4-12weeks       | Short GnRH agonist            | d-f, h, j-l  |
| Barad and Gleicher et al. (2006)(15) | United States of America | Self-controlled | DOR: < 4 oocytes retrieved, FSH >10 IU/l or E2 >75 pg/ml and poor embryo quality                                                                              | 25  | 40.4±0.8   | NA         | NA         | 25  | 39.9±0.8   | NA         | NA         | 75 mg/d   | 17.6±2.13 weeks | Norethindrone acetate tablets | f, h-i       |
| Barad et al. (2007)(15, 16)          | United States of America | Case-controlled | POA: bFSH <12 IU/l, but exceeding the 95% CI of the mean value for the patient's age group. DOR: bFSH ≥12 IU/l, and/ or a baseline estradiol level ≥ 75 pg/ml | 89  | 41.6±0.4   | NA         | 16±1.2     | 101 | 40±0.4     | NA         | 13.6±1     | 75 mg/d   | 3.8 ±0.3 months | Microdose agonist flare       | h-l          |
| Sonmezer et al. (2009)(17)           | Turkey                   | Self-controlled | POR: cycle cancellation or <4 oocytes retrieved                                                                                                               | 19  | 32.92±3.76 | 25.04±3.99 | 9.72±2.19  | 19  | 32.92±3.76 | 25.04±3.99 | 9.72±2.19  | 75 mg/d   | 90-180 d        | GnRH antagonist               | a, b, d-j    |
| Weissman et al. (2011)(18)           | Israel                   | Self-controlled | Poor response: ≥2 items: < 5 oocytes retrieved, ≤3 follicles of 16 mm, or E2 <500 pg/ml                                                                       | 15  | 38.8±3.4   | NA         | 13.3±4.7   | 15  | 38.8±3.4   | NA         | 13.3±4.7   | 75 mg/d   | ~3 months       | GnRH analog                   | d-j          |
| Fusi et al. (2013)(19)               | Italy                    | Self-controlled | DOR: AFC < 4, FSH > 10 IU/ml, AMH < 1 ng/ml                                                                                                                   | 39  | 38.07±2.9  | NA         | 9.67±3.9   | 24  | 38.07±2.9  | NA         | 9.67±3.9   | 75 mg/d   | > 3 months      | long GnRH agonist/ antagonist | b, c, f-j, l |
| Hyman et al. (2013)(20)              | Israel                   | Self-controlled | Poor response: ≤4 oocytes retrieved                                                                                                                           | 32  | 37.63±5.63 | NA         | 9.2±9      | 32  | 37.63±5.63 | NA         | 9.2±9      | 75 mg/d   | >3 months       | GnRH antagonist               | a, f-h       |
| Singh et al. (2013)(21)              | India                    | Self-controlled | Poor ovarian response in the previous IVF cycle(s)                                                                                                            | 17  | <35        | NA         | NA         | 17  | <35        | NA         | NA         | 75 mg/d   | 4 months        | Long agonist/ antagonist      | a-f, j       |
| Yilmaz et al. (2013)(22)             | Turkey                   | Self-controlled | DOR: AFC <5 or AMH <1.1 ng/ml, and a previous poor ovarian response                                                                                           | 41  | 33.78±3.11 | 24.93±2.52 | NA         | 41  | 33.78±3.11 | 24.93±2.52 | NA         | 75 mg/d   | > 6 weeks       | GnRH antagonist               | a-c, f       |
| Jirge et al. (2014)(23)              | India                    | Self-controlled | POR: Bologna criteria                                                                                                                                         | 25  | 33.76±5.13 | 24.19±4.94 | 13.8±1.69  | 29  | 33.76±5.13 | 24.19±4.94 | 13.8±1.69  | 90 mg/d   | > 2 months      | GnRH antagonist               | d-f, h-l     |
| Xu et al. (2014)(24)                 | China                    | Case-controlled | POR: Bologna criteria                                                                                                                                         | 189 | 37.67±4.67 | 21.77±5.9  | 12.34±3.79 | 197 | 38.1±4.22  | 21.4±5.1   | 11.84±3.64 | 75 mg/d   | 90 d            | GnRH antagonist               | d-j          |
| Zangmo et al. (2014)(25)             | India                    | Self-controlled | Poor response: <42 years, <5 oocytes and bFSH 10–20 IU/l                                                                                                      | 50  | 34.06±4    | 24.14±2.17 | 13.05±1.05 | 50  | 34.06±4    | 24.14±2.17 | 13.05±1.05 | 75 mg/d   | 4 months        | GnRH agonist/ antagonist      | b-e, h-j     |
| Tsui et al. (2015)(26)               | China                    | Self-controlled | POR: Bologna criteria                                                                                                                                         | 10  | 36.6±4.2   | 21.4±2.5   | 14.4±1.7   | 10  | 36.6±4.2   | 21.4±2.5   | 14.4±1.7   | 90 mg/d   | 12.2 weeks      | GnRH antagonist               | A-f, h-j     |
| Vlahos et al. (2015)(27)             | Greece                   | Case-controlled | Poor response: ≥2 items: >40 years, bFSH >9.5 IU/l, AMH< 2 ng/ml, < 3 oocytes                                                                                 | 48  | 39.67±0.54 | 22.3±0.6   | 13.19±0.33 | 113 | 39.07±0.34 | 23.7±0.8   | 12.46±0.22 | 50 mg/d   | > 3 months      | GnRH antagonist               | b-e, h-l     |



|                            |              |                 |                                                                                                                                          |    |                  |                  |                  |     |                  |                 |                  |           |          |                 |              |
|----------------------------|--------------|-----------------|------------------------------------------------------------------------------------------------------------------------------------------|----|------------------|------------------|------------------|-----|------------------|-----------------|------------------|-----------|----------|-----------------|--------------|
| Hu et al. (2017)(28)       | China        | Case-controlled | retrieved, previous cycle cancelation<br>DOR: $\geq 2$ items: FSH 10-25 IU/L, E <sub>2</sub> >80 pg/ml, AMH <0.5-1.1 ng/ml, AFC $\leq 5$ | 53 | 33.28 $\pm$ 3.13 | 22.32 $\pm$ 2.44 | 10.57 $\pm$ 1.91 | 50  | 34.16 $\pm$ 3.27 | 23.2 $\pm$ 4.41 | 10.45 $\pm$ 2.27 | 75 mg/d   | 8 weeks  | GnRH antagonist | a-j          |
| Chern et al. (2018)(29)    | China        | Case-controlled | POR: Bologna criteria                                                                                                                    | 67 | 39.1 $\pm$ 3.3   | 21.9 $\pm$ 2.9   | 7.1 $\pm$ 4.2    | 84  | 39.8 $\pm$ 3.7   | 21.8 $\pm$ 3.8  | 6.3 $\pm$ 4.6    | 90 mg/d   | 3 months | GnRH antagonist | d, e, h, j-l |
| Al-Turki et al. (2018)(30) | Saudi Arabia | Case-controlled | POR: Bologna criteria                                                                                                                    | 34 | 34.7 $\pm$ 4.37  | 21.7 $\pm$ 1.4   | 11.25 $\pm$ 2.62 | 28  | 33.9 $\pm$ 5.1   | 22.2 $\pm$ 1.1  | 10.96 $\pm$ 1.3  | 50 mg/d   | 3 months | GnRH antagonist | f-l          |
| Chen et al. (2019)(31)     | China        | Case-controlled | DOR: POSEIDON group 4 criteria                                                                                                           | 15 | 39.8 $\pm$ 2.5   | 22.3 $\pm$ 3.1   | 7.3 $\pm$ 4.5    | 138 | 40.2 $\pm$ 2.9   | 23 $\pm$ 3.7    | 6.3 $\pm$ 4.1    | 30 mg tid | 3 months | GnRH antagonist | d, e, h-l    |
| Ozcil et al. (2020)(32)    | Turkey       | Self-controlled | POI: 4-month period of amenorrhea, bFSH > 40 IU/L and a decrease in sex steroids in women <40 years.<br>POR: Bologna criteria            | 34 | 35.8 $\pm$ 7.6   | NA               | NA               | 34  | 35.8 $\pm$ 7.6   | NA              | NA               | 50 mg/d   | 5 months | Not reported    | b, c         |

Abbreviations: DHEA, dehydroepiandrosterone; RCT, randomized controlled trial; AMH, anti-Müllerian hormone; bFSH, basal follicle-stimulating hormone; AFC, antral follicle count; GnRH, gonadotropin-releasing hormone; DOR, diminished ovarian reserve; POR, poor ovarian response.

a. AFC; b. AMH; c. FSH; d. Total doses of Gn; e. Days of stimulation; f. E<sub>2</sub> level on the day of hCG; g. Endometrial thickness; h. Number of oocytes retrieved; i. Number of embryos transferred; j. Clinical pregnancy rate of IVF; k. Live birth rate; l. Miscarriage rate

Table S4. Results of quality assessment using ROBINS-I for non-RCTs.

| Study                            | Bias due to Confounding | Bias in Selection of Participants | Bias in Classification of Interventions | Bias due to Deviations from Intended Interventions | Bias due to Missing Data | Base in Measurement of Outcomes | Bias in Selection of the Reported Results | Overall  |
|----------------------------------|-------------------------|-----------------------------------|-----------------------------------------|----------------------------------------------------|--------------------------|---------------------------------|-------------------------------------------|----------|
| Barad and Gleicher et al. (2006) | Moderate                | Moderate                          | Low                                     | Moderate                                           | Low                      | Moderate                        | Serious                                   | Serious  |
| Barad et al. (2007)              | Moderate                | Moderate                          | Low                                     | Low                                                | Low                      | Moderate                        | Moderate                                  | Moderate |
| Sonmezer et al. (2009)           | Low                     | Moderate                          | Low                                     | Low                                                | Low                      | Moderate                        | Moderate                                  | Moderate |
| Weissman et al. (2011)           | Moderate                | Moderate                          | Low                                     | Moderate                                           | Low                      | Moderate                        | Moderate                                  | Moderate |
| Fusi et al. (2013)               | Low                     | Low                               | Low                                     | Moderate                                           | Low                      | Moderate                        | Moderate                                  | Moderate |
| Hyman et al. (2013)              | Moderate                | Moderate                          | Low                                     | Moderate                                           | Low                      | Moderate                        | Moderate                                  | Moderate |
| Singh et al. (2013)              | Moderate                | Moderate                          | Low                                     | Low                                                | Low                      | Moderate                        | Moderate                                  | Moderate |
| Yilmaz et al. (2013)             | Moderate                | Moderate                          | Low                                     | Moderate                                           | Low                      | Moderate                        | Moderate                                  | Moderate |
| Jirge et al. (2014)              | Moderate                | Moderate                          | Low                                     | Moderate                                           | Low                      | Moderate                        | Moderate                                  | Moderate |
| Xu et al. (2014)                 | Low                     | Moderate                          | Low                                     | Low                                                | Low                      | Moderate                        | Moderate                                  | Moderate |
| Zangmo et al. (2014)             | Moderate                | Moderate                          | Low                                     | Low                                                | Low                      | Moderate                        | Moderate                                  | Moderate |
| Tsui et al. (2015)               | Moderate                | Moderate                          | Low                                     | Low                                                | Low                      | Moderate                        | Moderate                                  | Moderate |
| Vlahos et al. (2015)             | Low                     | Moderate                          | Low                                     | Low                                                | Low                      | Moderate                        | Moderate                                  | Moderate |
| Hu et al. (2017)                 | Low                     | Moderate                          | Low                                     | Low                                                | Low                      | Moderate                        | Moderate                                  | Moderate |
| Chern et al. (2018)              | Moderate                | Moderate                          | Low                                     | Low                                                | Low                      | Moderate                        | Moderate                                  | Moderate |
| Al-Turki et al. (2018)           | Low                     | Moderate                          | Low                                     | Low                                                | Low                      | Moderate                        | Moderate                                  | Moderate |
| Chen et al. (2019)               | Moderate                | Moderate                          | Low                                     | Low                                                | Low                      | Moderate                        | Moderate                                  | Moderate |
| Ozcil et al. (2020)              | Moderate                | Moderate                          | Low                                     | Moderate                                           | Low                      | Moderate                        | Moderate                                  | Moderate |

Table S5. Meta-analyses of patients treated with DHEA or not.

| Outcomes                                            | No | WMD/RR  | 95%CI              | <i>P</i> value for<br>outcomes | heterogeneity      |                | Range     |
|-----------------------------------------------------|----|---------|--------------------|--------------------------------|--------------------|----------------|-----------|
|                                                     |    |         |                    |                                | I <sup>2</sup> , % | <i>P</i> value |           |
| <b>AFC</b>                                          |    |         |                    |                                |                    |                |           |
| Overall studies                                     | 10 | 0.96    | 0.48 to 1.44       | <0.001                         | 74.3               | <0.001         | 1.68-8.76 |
| RCTs                                                | 4  | 1.18    | 0.17 to 2.19       | 0.022                          | 87.6               | <0.001         |           |
| Non-RCTs                                            | 6  | 0.79    | 0.32 to 1.27       | 0.001                          | 45.6               | 0.102          |           |
| <b>FSH, IU/L</b>                                    |    |         |                    |                                |                    |                |           |
| Overall studies                                     | 13 | -2.03   | -3.10 to -0.95     | <0.001                         | 89.4               | <0.001         | 7.6-14.7  |
| RCTs                                                | 4  | -1.99   | -2.52 to -1.46     | <0.001                         | 0                  | 0.571          |           |
| Non-RCTs                                            | 9  | -2.22   | -3.8 to -0.64      | 0.006                          | 92.8               | <0.001         |           |
| <b>AMH, ng/mL</b>                                   |    |         |                    |                                |                    |                |           |
| Overall studies                                     | 13 | 0.34    | 0.17 to 0.51       | <0.001                         | 95                 | <0.001         | 0.65-3.8  |
| RCTs                                                | 5  | 0.1     | -0.14 to 0.34      | 0.416                          | 71.6               | 0.007          |           |
| Non-RCTs                                            | 8  | 0.48    | 0.25 to 0.71       | <0.001                         | 96.5               | <0.001         |           |
| <b>Total doses of Gn, IU</b>                        |    |         |                    |                                |                    |                |           |
| Overall studies                                     | 20 | -211.87 | -336.9 to -86.85   | 0.001                          | 92.3               | <0.001         | 2104-3920 |
| RCTs                                                | 9  | -382.29 | -644.82 to -119.76 | 0.004                          | 93.6               | <0.001         |           |
| Non-RCTs                                            | 11 | -45.72  | -200.72 to 109.28  | 0.563                          | 83.3               | <0.001         |           |
| <b>Days of stimulation, days</b>                    |    |         |                    |                                |                    |                |           |
| Overall studies                                     | 19 | -0.36   | -0.62 to -0.10     | 0.007                          | 80.4               | <0.001         | 8.75-13.4 |
| RCTs                                                | 8  | -0.90   | -1.34 to -0.47     | <0.001                         | 73.2               | <0.001         |           |
| Non-RCTs                                            | 11 | 0.04    | -0.14 to 0.23      | 0.663                          | 39.7               | 0.084          |           |
| <b>E<sub>2</sub> level on the day of hCG, pg/mL</b> |    |         |                    |                                |                    |                |           |
| Overall studies                                     | 25 | 88.43   | 45.15 to 131.71    | <0.001                         | 96.2               | <0.001         | 575-5082  |
| RCTs                                                | 13 | -33.21  | -222.59 to 156.17  | 0.731                          | 97.4               | <0.001         |           |

|                                      |    |       |                 |        |      |        |            |
|--------------------------------------|----|-------|-----------------|--------|------|--------|------------|
| Non-RCTs                             | 12 | 65.84 | 25.70 to 105.99 | 0.001  | 93.4 | <0.001 |            |
| <b>Endometrial thickness, mm</b>     |    |       |                 |        |      |        |            |
| Overall studies                      | 13 | 0.58  | -0.01 to 1.18   | 0.056  | 83.4 | <0.001 | 8.76-12.05 |
| RCTs                                 | 6  | 0.73  | -0.05 to 1.52   | 0.067  | 82.0 | <0.001 |            |
| Non-RCTs                             | 7  | 0.41  | -0.33 to 1.16   | 0.274  | 71.0 | 0.002  |            |
| <b>Number of oocytes retrieved</b>   |    |       |                 |        |      |        |            |
| Overall studies                      | 25 | 0.99  | 0.41 to 1.56    | 0.001  | 98.5 | <0.001 | 1.9-8.3    |
| RCTs                                 | 10 | 0.76  | -0.20 to 1.72   | 0.123  | 93.9 | <0.001 |            |
| Non-RCTs                             | 15 | 1.14  | 0.16 to 2.12    | 0.023  | 99.0 | <0.001 |            |
| <b>Number of oocytes transferred</b> |    |       |                 |        |      |        |            |
| Overall studies                      | 20 | 0.27  | 0.01 to 0.52    | 0.040  | 97.3 | <0.001 | 0.8-2.8    |
| RCTs                                 | 7  | 0.19  | -0.15 to 0.53   | 0.274  | 87.2 | <0.001 |            |
| Non-RCTs                             | 13 | 0.31  | -0.01 to 0.64   | 0.057  | 98.1 | <0.001 |            |
| <b>Clinical pregnancy rate</b>       |    |       |                 |        |      |        |            |
| Overall studies                      | 27 | 1.34  | 1.17 to 1.55    | <0.001 | 0    | 0.511  | /          |
| RCTs                                 | 13 | 1.18  | 0.98 to 1.41    | 0.081  | 0    | 0.83   |            |
| Non-RCTs                             | 14 | 1.63  | 1.30 to 2.05    | <0.001 | 0.8  | 0.439  |            |
| <b>Live birth rate</b>               |    |       |                 |        |      |        |            |
| Overall studies                      | 12 | 1.86  | 1.21 to 2.86    | 0.005  | 57.7 | 0.007  | /          |
| RCTs                                 | 6  | 1.59  | 0.87 to 2.93    | 0.134  | 64.5 | 0.015  |            |
| Non-RCTs                             | 6  | 2.26  | 1.25 to 4.10    | 0.007  | 42.4 | 0.123  |            |
| <b>Miscarriage rate</b>              |    |       |                 |        |      |        |            |
| Overall studies                      | 13 | 0.51  | 0.36 to 0.72    | <0.001 | 4.9  | 0.397  | /          |
| RCTs                                 | 6  | 0.46  | 0.29 to 0.73    | 0.001  | 0    | 0.752  |            |
| Non-RCTs                             | 7  | 0.59  | 0.35 to 1.00    | 0.048  | 44.4 | 0.109  |            |

---

Table S6. Univariable meta-regression analyses for outcomes with significant difference.

| Variable                        | FSH     |                |              | AMH     |                 |              | Days of stimulation |                  |              | E <sub>2</sub> level on the day of hCG administration |                    |              |
|---------------------------------|---------|----------------|--------------|---------|-----------------|--------------|---------------------|------------------|--------------|-------------------------------------------------------|--------------------|--------------|
|                                 | b       | 95%CI          | P            | b       | 95%CI           | P            | b                   | 95%CI            | P            | b                                                     | 95%CI              | P            |
| <b>Individual-level</b>         |         |                |              |         |                 |              |                     |                  |              |                                                       |                    |              |
| Baseline age, y                 | -0.04   | -0.92 to 0.84  | 0.922        | -0.12   | -0.33 to 0.09   | 0.230        | 0.009               | -0.16 to 0.18    | 0.903        | -25.44                                                | -146.79 to 95.91   | 0.669        |
| Baseline BMI, kg/m <sup>2</sup> | 0.46    | -0.82 to 1.73  | 0.425        | -0.03   | -0.24 to 0.18   | 0.743        | 0.01                | -0.21 to 0.24    | 0.902        | -22.24                                                | -166.02 to 121.54  | 0.746        |
| Basal FSH, IU/L                 | -0.944  | -1.62 to -0.25 | <b>0.014</b> | 0.14    | -0.10 to 0.37   | 0.200        | -0.03               | -0.22 to 0.17    | 0.776        | -4.28                                                 | -140.05 to 131.50  | 0.948        |
| Basal E <sub>2</sub> , pg/mL    | 0.001   | -0.05 to 0.05  | 0.942        | 0.0004  | -0.006 to 0.006 | 0.838        | 0.04                | -0.002 to 0.09   | 0.057        | -0.63                                                 | -1.48 to 0.21      | 0.122        |
| AMH, ng/mL                      | 2.99    | -1.12 to 7.10  | 0.125        | -0.60   | -1.15 to -0.06  | <b>0.035</b> | -0.30               | -1.49 to 0.89    | 0.585        | 222.35                                                | 30.15 to 414.55    | <b>0.027</b> |
| AFC                             | -0.03   | -1.06 to 0.99  | 0.939        | 0.016   | -0.36 to 0.39   | 0.919        | 0.02                | -0.31 to 0.35    | 0.913        | 104.08                                                | 2.30 to 205.85     | <b>0.046</b> |
| Duration of infertility, y      | -0.35   | -1.97 to 1.27  | 0.542        | 0.22    | -0.42 to 0.86   | 0.396        | -0.13               | -0.47 to 0.21    | 0.422        | 39.18                                                 | -112.54 to 190.91  | 0.586        |
| <b>Study-level</b>              |         |                |              |         |                 |              |                     |                  |              |                                                       |                    |              |
| Publication year                | -0.15   | -0.64 to 0.35  | 0.518        | -0.08   | -0.29 to 0.12   | 0.396        | -0.003              | -0.13 to 0.12    | 0.959        | 20.97                                                 | -61.98 to 103.93   | 0.606        |
| Study design                    |         |                |              |         |                 |              |                     |                  |              |                                                       |                    |              |
| RCTs                            | 1[Ref.] | NA             | NA           | 1[Ref.] | NA              | NA           | 1[Ref.]             | NA               | NA           | 1[Ref.]                                               | NA                 | NA           |
| Case-control                    | 1.09    | -4.72 to 6.90  | 0.685        | 0.12    | -1.08 to 1.32   | 0.832        | 0.95                | 0.31 to 1.60     | <b>0.007</b> | 600.71                                                | -216.16 to 1417.58 | 0.141        |
| Self-control                    | -0.96   | -5.40 to 3.49  | 0.642        | 0.65    | -0.25 to 1.55   | 0.140        | 0.82                | 0.09 to 1.55     | <b>0.029</b> | 268.04                                                | -304.50 to 840.58  | 0.342        |
| Sample size                     | 0.007   | -0.043 to 0.06 | 0.761        | -0.002  | -0.01 to 0.009  | 0.660        | 0.001               | -0.0007 to 0.003 | 0.227        | -0.22                                                 | -1.80 to 1.36      | 0.778        |
| Area, continent                 |         |                |              |         |                 |              |                     |                  |              |                                                       |                    |              |
| East Asia                       | 1[Ref.] | NA             | NA           | 1[Ref.] | NA              | NA           | 1[Ref.]             | NA               | NA           | 1[Ref.]                                               | NA                 | NA           |
| South Asia                      | -1.41   | -7.56 to 4.74  | 0.612        | 1.24    | 0.60 to 1.88    | <b>0.002</b> | 0.06                | -1.02 to 1.14    | 0.904        | 894.69                                                | -158.68 to 1948.06 | 0.091        |
| West Asia                       | 0.61    | -5.11 to 6.33  | 0.812        | -0.05   | -0.57 to 0.47   | 0.832        | 0.64                | -0.61 to 1.90    | 0.291        | 260.01                                                | -414.38 to 934.40  | 0.430        |
| Europe                          | 2.41    | -3.90 to 8.72  | 0.405        | -0.30   | -0.85 to 0.24   | 0.238        | -0.19               | -1.56 to 1.19    | 0.776        | 434.37                                                | -429.44 to 1298.19 | 0.306        |
| Africa                          | 0.44    | -7.39 to 8.28  | 0.899        | -0.06   | -0.72 to 0.59   | 0.831        | -0.69               | -1.90 to 0.53    | 0.245        | 525.65                                                | -488.23 to 1539.53 | 0.291        |
| America                         | NA      | NA             | NA           | NA      | NA              | NA           | NA                  | NA               | NA           | 770.43                                                | -620.28 to 2161.14 | 0.261        |
| Duration of DHEA                |         |                |              |         |                 |              |                     |                  |              |                                                       |                    |              |
| <3 months                       | 1[Ref.] | NA             | NA           | 1[Ref.] | NA              | NA           | 1[Ref.]             | NA               | NA           | 1[Ref.]                                               | NA                 | NA           |
| =3 months                       | 0.25    | -4.78 to 5.29  | 0.913        | -0.11   | -0.75 to 0.53   | 0.705        | -0.13               | -1.07 to 0.80    | 0.768        | -445.20                                               | -995.87 to 10648   | 0.108        |
| >3 months                       | -1.42   | -5.96 to 2.25  | 0.338        | 0.96    | 0.15 to 1.77    | 0.025        | 1.20                | 1.09 to 1.50     | 0.744        | 295.78                                                | -544.41 to 1135.97 | 0.473        |

Figure S1. Results of quality assessment using ROB2 for RCTs.

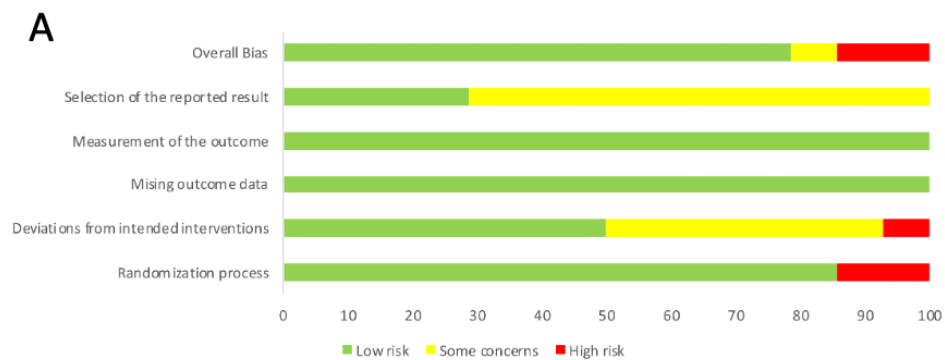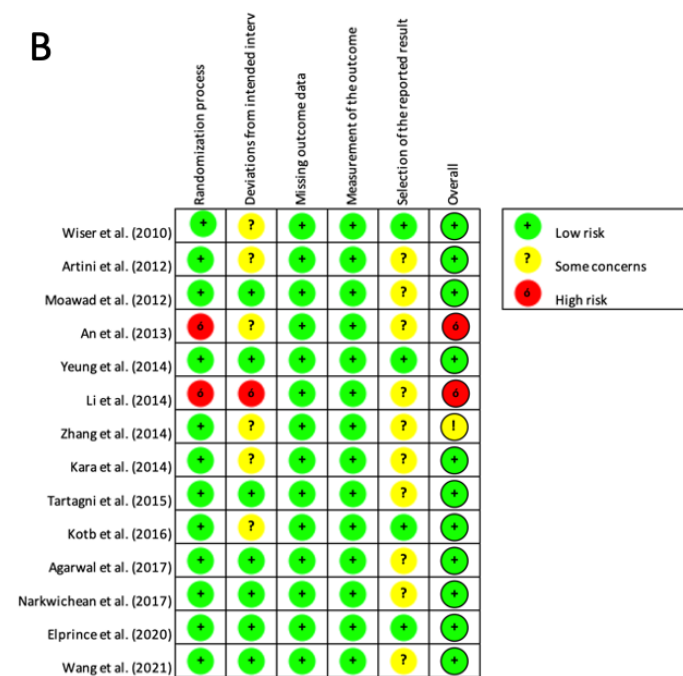

Figure S2. Funnel plots of the studies to assess publishing bias for **(A)** AFC ( $P_{\text{Egger}}=0.132$ ); **(B)** AMH ( $P_{\text{Egger}}=0.009$ ); **(C)** FSH ( $P_{\text{Egger}}=0.973$ ); **(D)** Total doses of gonadotropin ( $P_{\text{Egger}}=0.021$ ); **(E)** Days of stimulation ( $P_{\text{Egger}}=0.084$ ); **(F)** E<sub>2</sub> level on the day of hCG ( $P_{\text{Egger}}=0.218$ ); **(G)** Endometrial thickness ( $P_{\text{Egger}}=0.529$ ); **(H)** Number of oocytes retrieved ( $P_{\text{Egger}}=0.002$ ); **(I)** Number of oocytes transferred ( $P_{\text{Egger}}=0.044$ ); **(J)** Clinical pregnancy rate of IVF ( $P_{\text{Egger}}=0.106$ ); **(K)** Live birth rate ( $P_{\text{Egger}}=0.453$ ); **(L)** Miscarriage rate ( $P_{\text{Egger}}=0.435$ ).

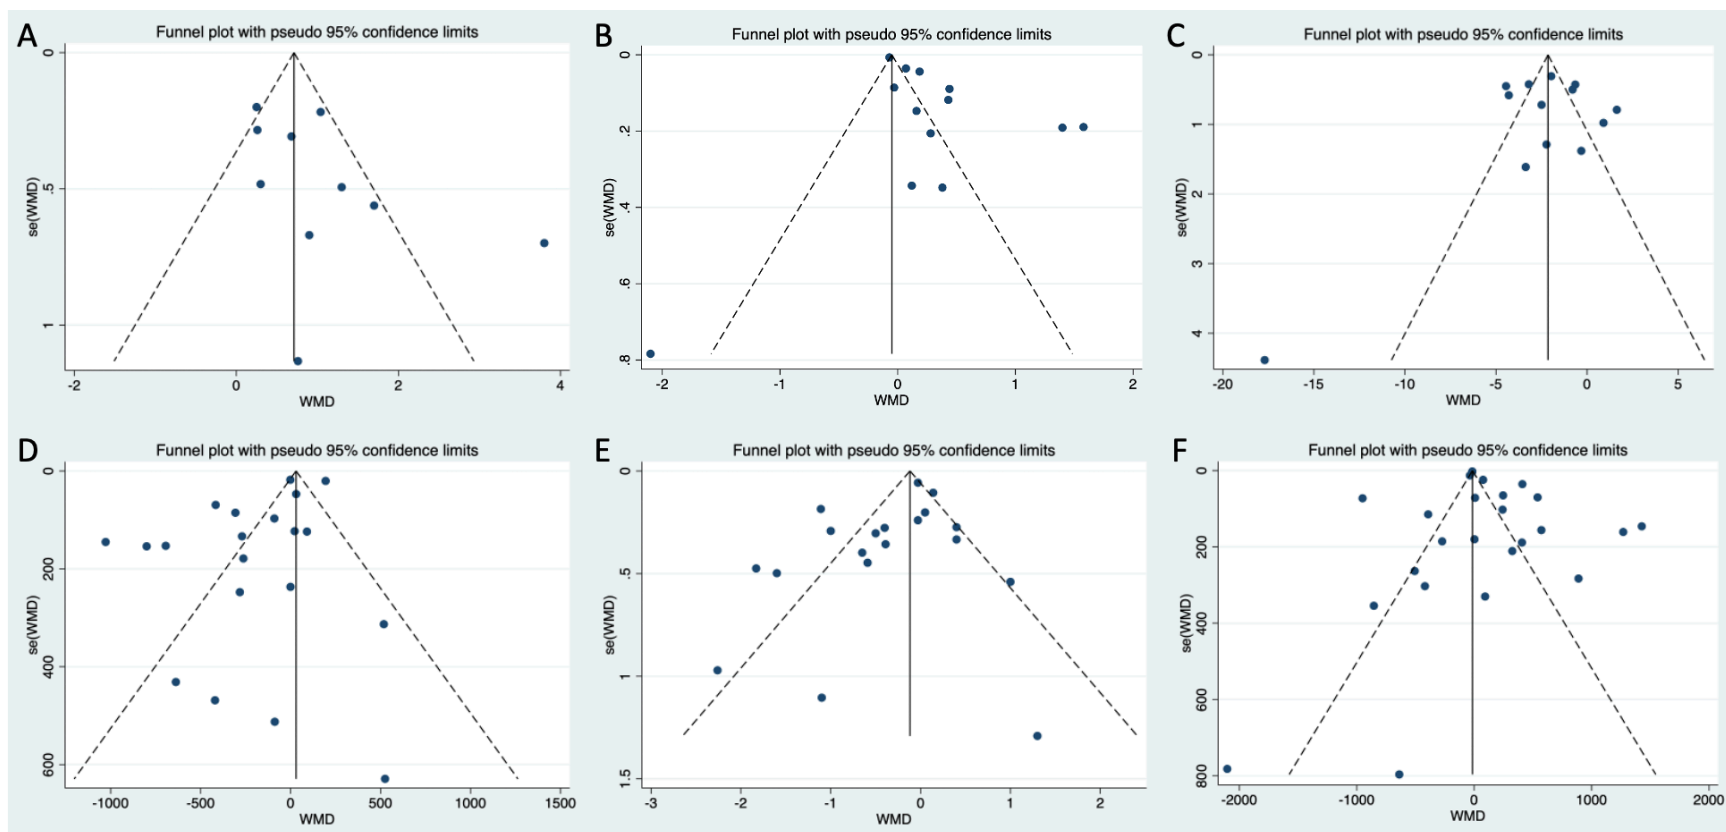

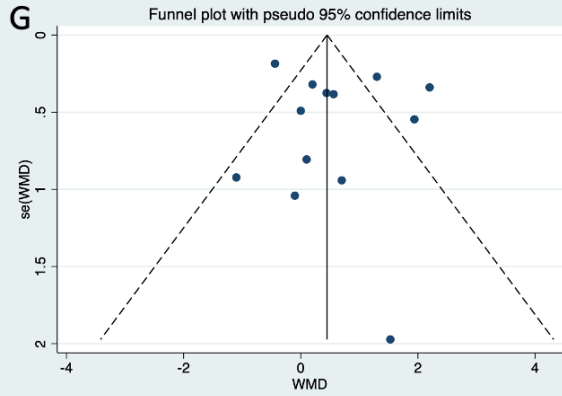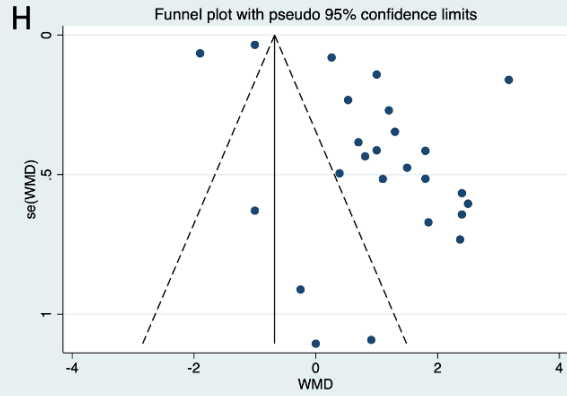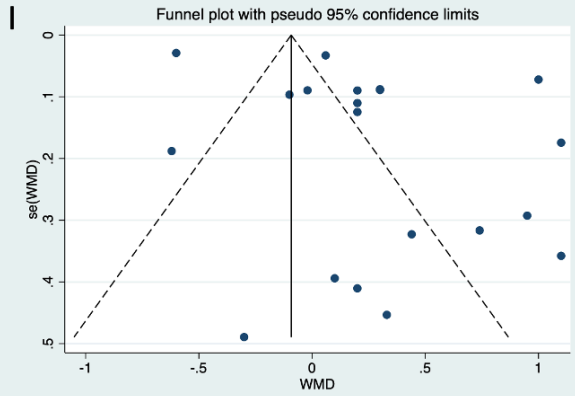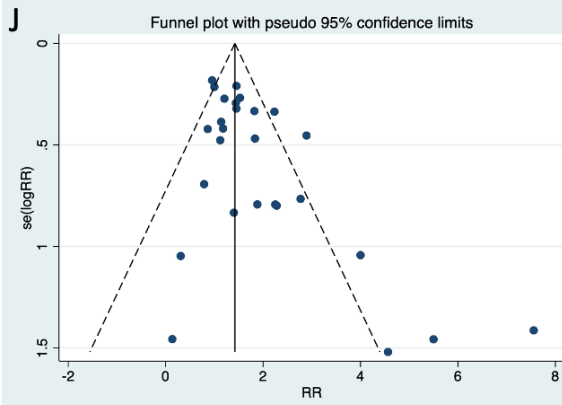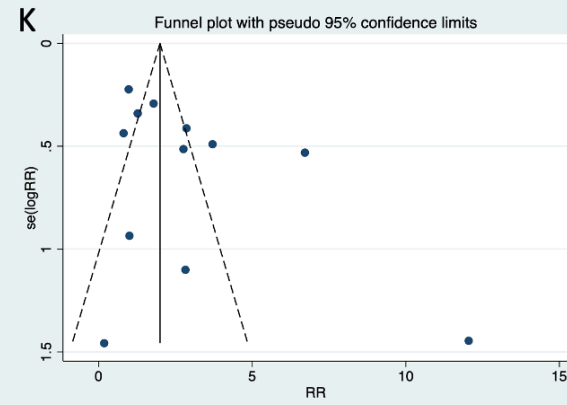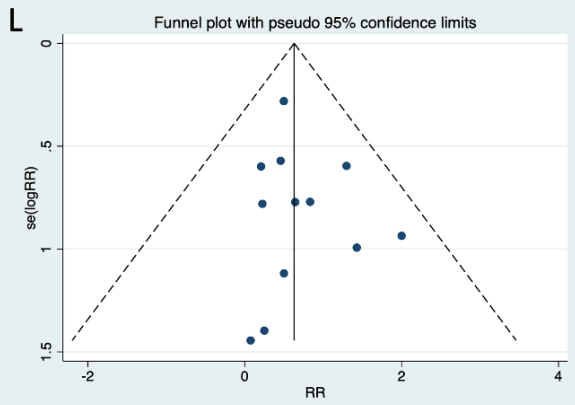



Figure S3. The subgroup meta-analysis by type of study design for the outcome of days of stimulation in poor responders undergoing IVF treatment.

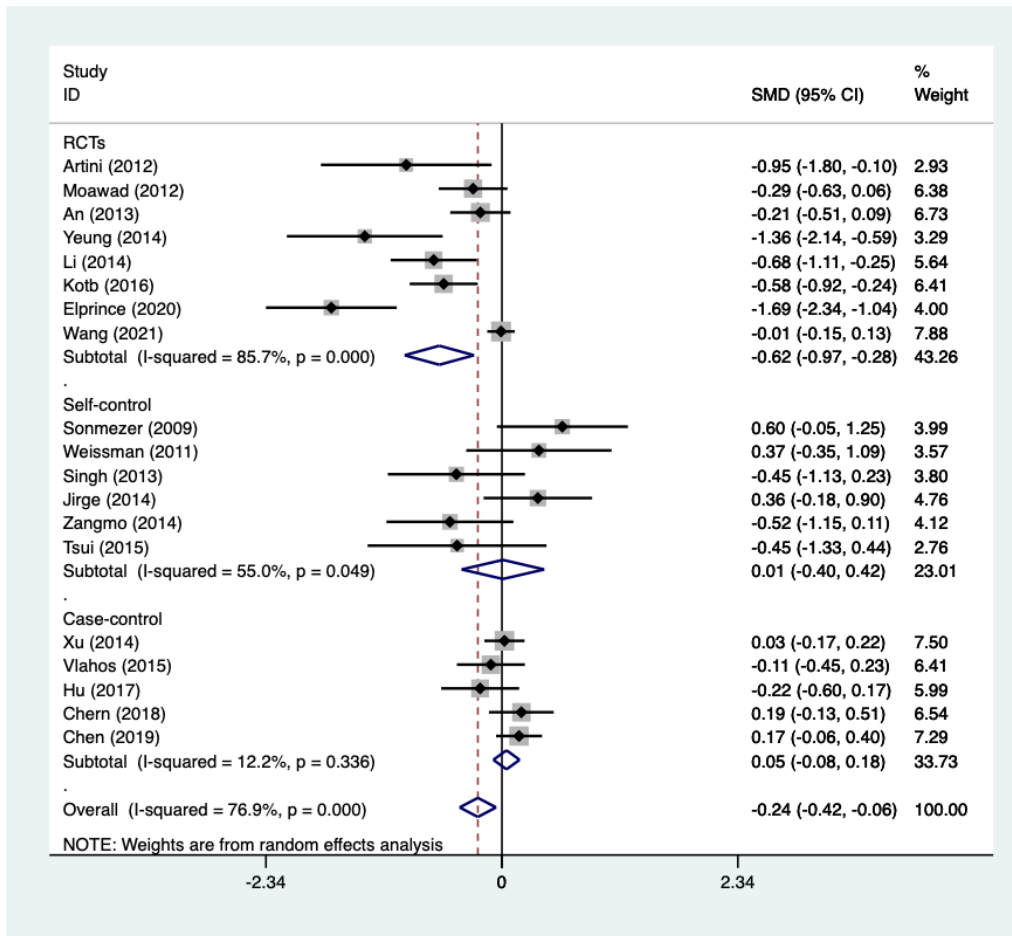

## References:

1. Wisner A, Gonen O, Ghetler Y, Shavit T, Berkovitz A, Shulman A. Addition of dehydroepiandrosterone (DHEA) for poor-responder patients before and during IVF treatment improves the pregnancy rate: a randomized prospective study. *Hum Reprod* (2010) 25:2496-500. doi: 10.1093/humrep/deq220
2. Artini PG, Simi G, Ruggiero M, Pinelli S, Di Berardino OM, Papini F, et al. DHEA supplementation improves follicular microenvironment in poor responder patients. *Gynecol Endocrinol* (2012) 28:669-73. doi: 10.3109/09513590.2012.705386
3. Moawad A, Shaer M. Long-term androgen priming by use of dehydroepiandrosterone (DHEA) improves IVF outcome in poor-responder patients. A randomized controlled study. *Middle East Fertil Soc J* (2012) 17:137-42. doi: 10.1007/s13224-016-0941-8
4. An J, Wang Y, Ni YL, Chai SM. Application of dehydroepiandrosterone (DHEA) supplementation in in vitro fertilization and embryo transfer cycles. *Reprod Contracep* (2013) 33:89-92. doi: 10.1007/s13224-016-0941-8
5. Yeung TW, Chai J, Li RH, Lee VC, Ho PC, Ng EH. A randomized, controlled, pilot trial on the effect of dehydroepiandrosterone on ovarian response markers, ovarian response, and in vitro fertilization outcomes in poor responders. *Fertil Steril* (2014) 102:108-15 e1. doi: 10.1016/j.fertnstert.2014.03.044
6. Li J, Ren CE, Zhang AQ, Du T. Effect of dehydroepiandrosterone (DHEA) supplementation on IVF-ET of patients with diminished ovarian reserve (DOR). *J Liaoning Medical University* (2014) 35:51-3. doi: 10.1136/bmj.i4919
7. Zhang HH, Xu PY, Wu J, Zou WW, Xu XM, Cao XY, et al. Dehydroepiandrosterone improves follicular fluid bone morphogenetic protein-15 and accumulated embryo score of infertility patients with diminished ovarian reserve undergoing in vitro fertilization: a randomized controlled trial. *J Ovarian Res* (2014) 7:93. doi: 10.1186/s13048-014-0093-3
8. Kara M, Aydin T, Aran T, Turktekin N, Ozdemir B. Does dehydroepiandrosterone supplementation really affect IVF-ICSI outcome in women with poor ovarian reserve? *Eur J Obstet Gynecol Reprod Biol* (2014) 173:63-5. doi: 10.1016/j.ejogrb.2013.11.008
9. Tartagni M, Cicinelli MV, Baldini D, Tartagni MV, Alrasheed H, DeSalvia MA, et al. Dehydroepiandrosterone decreases the age-related decline of the in vitro fertilization outcome in women younger than 40 years old. *Reprod Biol Endocrinol* (2015) 13:18. doi: 10.1186/s12958-015-0014-3
10. Kotb MM, Hassan AM, AwadAllah AM. Does dehydroepiandrosterone improve pregnancy rate in women undergoing IVF/ICSI with expected poor ovarian response according to the Bologna criteria? A randomized controlled trial. *Eur J Obstet Gynecol Reprod Biol* (2016) 200:11-5. doi: 10.1016/j.ejogrb.2016.02.009
11. Agarwal R, Shruthi R, Radhakrishnan G, Singh A. Evaluation of Dehydroepiandrosterone Supplementation on Diminished Ovarian Reserve: A Randomized, Double-Blinded, Placebo-Controlled Study. *J Obstet Gynaecol India* (2017) 67:137-42. doi: 10.1007/s13224-016-0941-8

12. Narkwichean A, Maalouf W, Baumgarten M, Polanski L, Raine-Fenning N, Campbell B, et al. Efficacy of Dehydroepiandrosterone (DHEA) to overcome the effect of ovarian ageing (DITTO): A proof of principle double blinded randomized placebo controlled trial. *Eur J Obstet Gynecol Reprod Biol* (2017) 218:39-48. doi: 10.1016/j.ejogrb.2017.09.006
13. Elprince M, Kishk EA, Metawie OM, Albiely MM. Ovarian stimulation after dehydroepiandrosterone supplementation in poor ovarian reserve: a randomized clinical trial. *Arch Gynecol Obstet* (2020) 302:529-34. doi: 10.1007/s00404-020-05603-5
14. Wang Z, Yang A, Bao H, Wang A, Deng X, Xue D, et al. Effect of dehydroepiandrosterone administration before in vitro fertilization on the live birth rate in poor ovarian responders according to the Bologna criteria: A randomised controlled trial. *BJOG* (2022) 129:1030-8. doi: 10.1111/1471-0528.17045
15. Barad D, Gleicher N. Effect of dehydroepiandrosterone on oocyte and embryo yields, embryo grade and cell number in IVF. *Hum Reprod* (2006) 21:2845-9. doi: 10.1093/humrep/del254
16. Barad D, Brill H, Gleicher N. Update on the use of dehydroepiandrosterone supplementation among women with diminished ovarian function. *J Assist Reprod Genet* (2007) 24:629-34. doi: 10.1007/s10815-007-9178-x
17. Sönmezer M, Ozmen B, Cil AP, Ozkavukçu S, Taşçi T, Olmuş H, et al. Dehydroepiandrosterone supplementation improves ovarian response and cycle outcome in poor responders. *Reprod Biomed Online* (2009) 19:508-13. doi: 10.1016/j.rbmo.2009.06.006
18. Weissman A, Horowitz E, Ravhon A, Golan A, Levran D. Dehydroepiandrosterone supplementation increases baseline follicular phase progesterone levels. *Gynecol Endocrinol* (2011) 27:1014-7. doi: 10.3109/09513590.2011.569611
19. Fusi FM, Ferrario M, Bosisio C, Arnoldi M, Zanga L. DHEA supplementation positively affects spontaneous pregnancies in women with diminished ovarian function. *Gynecol Endocrinol* (2013) 29:940-3. doi: 10.3109/09513590.2013.819087
20. Hyman JH, Margalioth EJ, Rabinowitz R, Tsafir A, Gal M, Alerhand S, et al. DHEA supplementation may improve IVF outcome in poor responders: a proposed mechanism. *Eur J Obstet Gynecol Reprod Biol* (2013) 168:49-53. doi: 10.1016/j.ejogrb.2012.12.017
21. Singh N, Zangmo R, Kumar S, Roy KK, Sharma JB, Malhotra N, et al. A prospective study on role of dehydroepiandrosterone (DHEA) on improving the ovarian reserve markers in infertile patients with poor ovarian reserve. *Gynecol Endocrinol* (2013) 29:989-92. doi: 10.3109/09513590.2013.824957
22. Yilmaz N, Uygur D, Inal H, Gorkem U, Cicek N, Mollamahmutoglu L. Dehydroepiandrosterone supplementation improves predictive markers for diminished ovarian reserve: serum AMH, inhibin B and antral follicle count. *Eur J Obstet Gynecol Reprod Biol* (2013) 169:257-60. doi: 10.1016/j.ejogrb.2013.04.003
23. Jirge PR, Chougule SM, Gavali VG, Bhomkar DA. Impact of dehydroepiandrosterone on clinical outcome in poor responders: A pilot study in women undergoing in vitro fertilization, using bologna criteria. *J Hum Reprod Sci* (2014) 7:175-80. doi: 10.4103/0974-1208.142477
24. Xu B, Li Z, Yue J, Jin L, Li Y, Ai J, et al. Effect of dehydroepiandrosterone administration in patients with poor ovarian response according to the Bologna criteria. *PLoS One* (2014) 9:e99858. doi: 10.1371/journal.pone.0099858

25. Zangmo R, Singh N, Kumar S, Vanamail P, Tiwari A. Role of dehydroepiandrosterone in improving oocyte and embryo quality in IVF cycles. *Reprod Biomed Online* (2014) 28:743-7. doi: 10.1016/j.rbmo.2014.01.019
26. Tsui KH, Lin LT, Chang R, Huang BS, Cheng JT, Wang PH. Effects of dehydroepiandrosterone supplementation on women with poor ovarian response: A preliminary report and review. *Taiwan J Obstet Gynecol* (2015) 54:131-6. doi: 10.1016/j.tjog.2014.07.007
27. Vlahos N, Papalouka M, Triantafyllidou O, Vlachos A, Vakas P, Grimbizis G, et al. Dehydroepiandrosterone administration before IVF in poor responders: a prospective cohort study. *Reprod Biomed Online* (2015) 30:191-6. doi: 10.1016/j.rbmo.2014.10.005
28. Hu Q, Hong L, Nie M, Wang Q, Fang Y, Dai Y, et al. The effect of dehydroepiandrosterone supplementation on ovarian response is associated with androgen receptor in diminished ovarian reserve women. *J Ovarian Res* (2017) 10:32. doi: 10.1186/s13048-017-0326-3
29. Chern CU, Tsui KH, Vitale SG, Chen SN, Wang PH, Cianci A, et al. Dehydroepiandrosterone (DHEA) supplementation improves in vitro fertilization outcomes of poor ovarian responders, especially in women with low serum concentration of DHEA-S: a retrospective cohort study. *Reprod Biol Endocrinol* (2018) 16:90. doi: 10.1186/s12958-018-0409-z
30. Al-Turki HA. Dehydroepiandrosterone supplementation in women undergoing assisted reproductive technology with poor ovarian response. A prospective case-control study. *J Int Med Res* (2018) 46:143-9. doi: 10.1177/0300060517720005
31. Chen SN, Tsui KH, Wang PH, Chern CU, Wen ZH, Lin LT. Dehydroepiandrosterone Supplementation Improves the Outcomes of in vitro Fertilization Cycles in Older Patients With Diminished Ovarian Reserve. *Front Endocrinol (Lausanne)* (2019) 10:800. doi: 10.3389/fendo.2019.00800
32. Ozcil MD. Dehydroepiandrosterone supplementation improves ovarian reserve and pregnancy rates in poor responders. *Eur Rev Med Pharmacol Sci* (2020) 24:9104-11. doi: 10.26355/eurrev\_202009\_22856
